# Supplementary material
Source: PubMed Central journal article supplement (PMC7513333)
Supplement: ao0c02772_si_001.pdf [file ao0c02772_si_001.pdf]

## *Supporting Information*

# Controlling Miscibility of the Interphase in Polymer-Grafted Nanocellulose/Cellulose Triacetate Nanocomposites

Hiroto Soeta, Shuji Fujisawa, Tsuguyuki Saito, and Akira Isogai\*

Department of Biomaterials Science, Graduate School of Agricultural and Life Sciences, The University of Tokyo, 113-8657 Tokyo, Japan.

\*Tel: +81 3 5841 5538. E-mail: aisogai@mail.ecc.u-tokyo.ac.jp.

**Evaporation Rate of Casting Solvents.** In the present study, the evaporation rate was controlled by covering the petri dish with a PTFE sheet with holes and changing the pressure during drying. The detailed conditions are shown in Table S1.

**Table S1** Drying Conditions of PEG-TOCN/CTA Composite Films.

|      | temperature (°C) | vacuum (MPa) | cover of petri dish during drying of dispersion |
|------|------------------|--------------|-------------------------------------------------|
| DCM  | 40               | -0.03        | PTFE with 20 holes                              |
| DOX  | 40               | < -0.1       | none                                            |
| DMAc | 40               | -0.04        | none                                            |

**Crystallinity of CTA Matrix in PEG-TOCN/CTA Composites.** The crystallinities of the CTA matrix were calculated from the WAXD data with the Ruland-Vonk or amorphous contribution subtraction method (Table S2).<sup>1,2</sup> Peak positions corresponding to the crystalline and amorphous CTA were determined according to previous studies.<sup>3,4</sup>

**Table S2** Crystallinity of CTA Matrix in PEG-TOCN/CTA Composite Films.

|      | Crystallinity (%) |              |
|------|-------------------|--------------|
|      | Pristine CTA      | PEG-TOCN/CTA |
| DMAc | 35.3              | 33.9         |
| DOX  | 27.8              | 29.6         |
| DMAc | 28.8              | 29.4         |

**Dynamic Mechanical Properties of PEG-NH<sub>2</sub>/CTA Blend Films.** The glass transition temperatures ( $T_g$ ) of the CTA matrix in the PEG-NH<sub>2</sub>/CTA blend films are shown in Figure S2. The addition of PEG-NH<sub>2</sub> caused a decrease in  $T_g$ . This indicates that free PEG-NH<sub>2</sub> chains were miscible with the CTA matrix and had a plasticizing effect on the films regardless of the casting solvent.

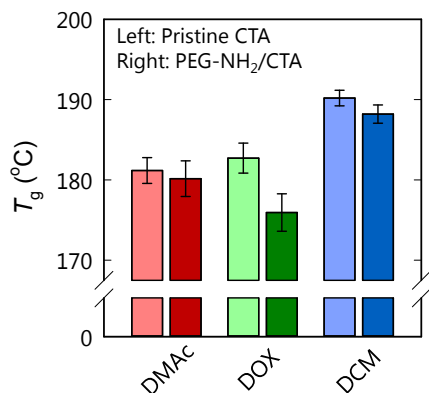

**Figure S1.** Glass transition temperature of the PEG-NH<sub>2</sub>/CTA blend films calculated from

tan $\delta$  curves. DMAc: *N,N*-dimethylacetamide, DOX: 1,4-dioxane, and DCM: dichloromethane.

### Statistical Analysis for Mechanical and Thermal Properties of PEG-TOCN/CTA Composite

**Films.** Welch's unequal variances *t*-test was performed to confirm the statistical significance of differences in mechanical properties and  $T_g$  of the pristine CTA and PEG-TOCN/CTA composite films. The *t*-test was performed as a two-tailed test on Microsoft Excel 2010 using Analysis ToolPak. If the *p* value is less than 0.025, it is interpreted that two populations have different means. The results are shown in Table S3. In the case of  $T_g$ , the *p* value was greater than 0.025. This is probably because of the small sample numbers ( $N = 3$ ) in dynamic mechanical analysis.

**Table S3** The *t* and *p* Values for Difference in Mechanical and Thermal Properties.

|                  | DMAc     |                | DOX      |                | DCM      |                |
|------------------|----------|----------------|----------|----------------|----------|----------------|
|                  | <i>t</i> | <i>p</i> value | <i>t</i> | <i>p</i> value | <i>t</i> | <i>p</i> value |
| Young's modulus  | -2.93    | 0.008          | 3.31     | 0.003          | -4.70    | 0.001          |
| Tensile strength | -2.70    | 0.015          | -1.66    | 0.108          | -3.55    | 0.009          |
| Toughness        | -3.55    | 0.004          | -2.87    | 0.007          | -3.75    | 0.002          |
| Yield strength   | -0.99    | 0.337          | -2.18    | 0.036          | -3.54    | 0.012          |
| $T_g$            | -1.89    | 0.131          | -0.60    | 0.591          | 2.65     | 0.118          |

**Mechanical Properties of PEG-NH<sub>2</sub>/CTA Blend Films.** Mechanical properties of PEG-NH<sub>2</sub>/CTA blend films are shown in Figure S1. No improvement in Young's modulus or yield strength was observed. The tensile strength and toughness of the composite films was slightly decreased by the addition of PEG-NH<sub>2</sub>.

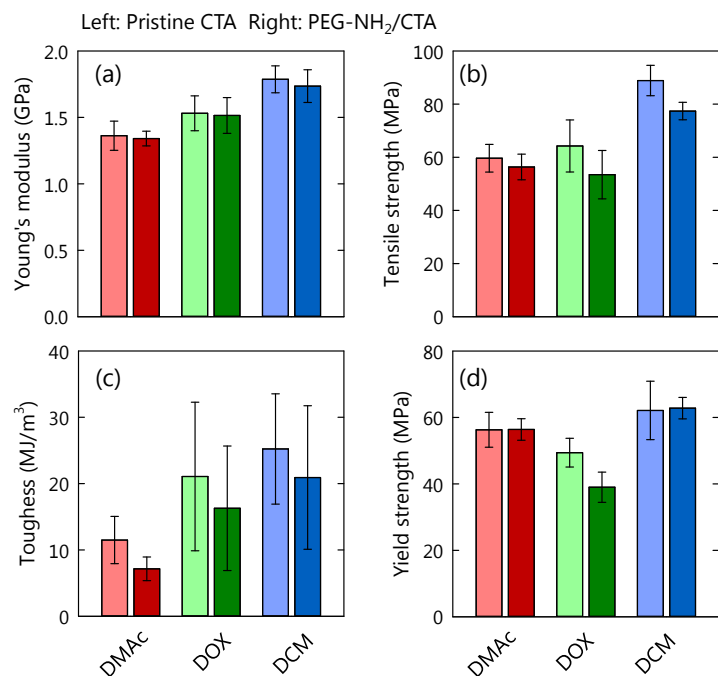

**Figure S2.** Mechanical properties of the PEG-NH<sub>2</sub>/CTA blend films: (a) Young's modulus, (b) tensile strength, (c) toughness, and (d) Yield strength. DMAc: *N,N*-dimethylacetamide, DOX: 1,4-dioxane, and DCM: dichloromethane.

**Fundamental Properties of Nanocomposite Films.** The densities and water contents of the composite films are shown in Table S4. The density and water content of a nanocomposite film were calculated by weighing the specimens before and after drying at 105 °C for 3 h.

**Table S4** Densities and Water Contents of PEG-TOCN/CTA Composite Films.

|      | density (g/cm <sup>3</sup> ) |              | water content (%) |              |
|------|------------------------------|--------------|-------------------|--------------|
|      | Pristine CTA                 | PEG-TOCN/CTA | Pristine CTA      | PEG-TOCN/CTA |
| DMAc | 1.18 ± 0.04                  | 1.18 ± 0.04  | 1.77 ± 0.51       | 1.66 ± 0.10  |
| DOX  | 1.17 ± 0.02                  | 1.15 ± 0.03  | 1.84 ± 0.22       | 1.93 ± 0.35  |

|     |                 |                 |                 |                 |
|-----|-----------------|-----------------|-----------------|-----------------|
| DCM | $1.19 \pm 0.01$ | $1.21 \pm 0.02$ | $1.60 \pm 0.21$ | $1.50 \pm 0.15$ |
|-----|-----------------|-----------------|-----------------|-----------------|

---

## REFERENCES

- (S1) de Freitas, R. R. M.; Senna, A. M.; Botaro, V. R. Influence of Degree of Substitution on Thermal Dynamic Mechanical and Physicochemical Properties of Cellulose Acetate. *Ind. Crops Prod.* **2017**, *109*, 452–458.
- (S2) Karimi, K.; Taherzadeh, M. J. A Critical Review of Analytical Methods in Pretreatment of Lignocelluloses: Composition, Imaging, and Crystallinity. *Bioresour. Technol.* **2016**, *200*, 1008–1018.
- (S3) Hindeleh, A. M.; Johnson, D. J. Correlation Crystallinity and Physical Properties of Heat-Treated Cellulose Triacetate Fibres. *Polymer (Guildf)* **1970**, *11*, 666–680.
- (S4) Hindeleh, A. M.; Johnson, D. J. Peak Resolution and X-Ray Crystallinity Determination in Heat-Treated Cellulose Triacetate. *Polymer (Guildf)* **1972**, *13*, 27–32.
